# Supplementary material for: Catchment-Scale Participatory Mapping Identifies Stakeholder Perceptions of Land and Water Management Conflicts
Source: MDPI journal article supplement (doi:10.3390/land11020300), 2022-02-16
Supplement: s1 [file s1]

## Supplementary material

### Interview protocol and questionnaire

The purpose of the study was explained to participants, along with confidentiality procedures on paper which was signed to express their consent. Participants were then shown a map of their catchments that included land cover data and were given time to familiarise themselves with the legend.

*Q1: Looking at this map, what are the three most significant ecosystem services the catchment provides?*

*Q2: Can these services be supplied unimpeded by one another from the catchment or do they compete for space?*

Participants were then shown a map of their catchments that included land cover data and in which the catchment was split by two lines into equal areas into an upstream, middle, and downstream area.

*Q3: Looking at the map, what are the three most significant ecosystem services each zone provides?*

*Q4: Within the zones, do these three services compete for space? Can you rank the three zones from lowest to highest competition between land uses?*

*Q5: Are there pressures from stakeholder groups to increase or reduce any of these ecosystem service provisions?*

*Q6: If so, has this caused conflict with other stakeholder groups?*

*Q7: if not, are there any other ecosystem services or land uses which stakeholder groups want to increase or reduce and has this caused conflict between groups?*

Participants were now given a permanent marker pen and asked to draw and annotate as follows.

*Q8: Which areas in the catchment do you believe to be under most conflict or pressure from competing land use and why? You may identify these by drawing on the map, and/or selecting a land cover type.*

*Q9: What are the major drivers for conflict between land use, ecosystem service provision and stakeholders in your catchment?*

*Q10: What do you think could be done to reduce conflict between stakeholders in your catchment?*

*Q11: By 2030, what will be the major drivers for conflict between land use, ecosystem service provision and stakeholders in your catchment?*

*Q12: When the United Kingdom leaves the European Union, do you expect land use, ecosystem service provision and stakeholder conflict in your catchment to change?*
